# Supplementary material for: Population trend inferred from aural surveys for calling anurans in Korea
Source: PeerJ. 2018 Sep 19;6:e5568. doi: 10.7717/peerj.5568 (PMC6151124; doi:10.7717/peerj.5568)
Supplement: Data S1 — Raw data for surveys conducted between 2014 and 2017 for Dryophytes suweonensis. [file peerj-06-5568-s001.xlsx]

## Sheet: Dataset_field-surveys_Borzee et
Site ID	Year	Date	Time	Air temperature (c)	Air humidity (%)	Wind (scale)	Cloud (scale)	Rain (scale)	Luminosity (lx)	Air pressure (hPa)	Night (scale)	Moon (%)	Water temperature (c)	Water pH	Water conductivity (uS)	D. suweonensis (#)	CI D. japonicus	CI P. nigromaculatus	CI P. chosenicus	Presence L. catesbeianus	Encroachment
1	2015	2015-05-15	19:45:00	21	31.8	4	1	0	83	1026	5	13	19.7	9.1	746	27	3	1	1	0	0
2	2015	2015-06-02	17:10:00	30.3	33.6	3	3	0	48100	1013	5	100	27.5	9.4	931	4	0	0	0	0	0
7	2015	2015-06-02	17:40:00	27.4	36.93	4	0	0	18210	1015	5	100	27.8	8.7	936	13	0	0	0	0	1
10	2015	2015-06-02	18:20:00	26.8	35.4	0	4	0	16920	1015	5	100	27.9	8.4	994	2	0	0	0	0	1
11	2015	2015-06-02	18:40:00	25.9	38.1	3	0	0	9070	1015	5	100	24.5	8.6	997	11	0	0	0	0	1
13	2015	2015-06-02	19:00:00	24.2	42.7	4	4	0	3150	1018	5	100	23.5	9.3	822	50	0	0	0	0	0
19	2015	2015-06-02	19:40:00	22.1	45	3	3	0	52	1020	5	100	23.5	8.3	1030	17	3	0	0	0	0
22	2015	2015-06-02	20:50:00	20.2	59.2	2	4	0	1	1024	3	100	20.7	8.6	1440	4	3	2	2	0	0
23	2015	2015-06-02	20:30:00	21.6	53.8	4	4	0	1	1022	3	100	20	8.4	1710	26	3	0	1	0	0
24	2015	2015-05-30	23:05:00	17.3	75.4	0	3	0	1	1026	2	81	17.2	8.9	846	14	3	3	0	0	0
27	2015	2015-06-02	21:15:00	19.9	61	2	4	0	1	1025	3	100	21	8.4	1590	11	3	1	2	0	0
35	2015	2015-05-30	22:35:00	16.9	78.8	4	3	0	1	1025	3	81	18.3	8.7	786	0	3	1	1	0	0
36	2015	2015-05-30	21:55:00	17.2	77.3	0	4	0	1	1025	3	86	18.5	9.9	276	0	3	2	0	0	1
50	2015	2015-06-02	22:05:00	19.9	53.7	0	4	0	1	1024	3	100	20.2	8.2	1180	4	3	1	1	0	0
54	2015	2015-05-28	21:55:00	22	54.4	1	0	0	1	1022	2	71	21	8.6	482	0	3	1	1	0	0
64	2015	2015-06-02	22:55:00	20.3	66.2	4	4	0	1	1025	3	100	18.8	8.2	1790	29	3	3	2	0	0
65	2015	2015-06-02	23:15:00	19.9	71.5	2	4	0	1	1025	3	100	18.8	8.1	1451	21	3	2	2	0	0
69	2015	2015-06-03	00:40:00	18	52.2	4	4	0	1	1026	3	100	17.1	8.1	1930	4	2	3	2	0	0
70	2015	2015-06-02	23:50:00	19.5	60.5	1	4	0	1	1026	3	100	18.8	8.1	1100	4	2	2	1	1	0
0	2015	2015-05-28	21:20:00	21	47.6	0	0	0	1	1025	5	71	18	8.5	20.1	0	3	2	0	0	0
0	2015	2015-05-28	19:55:00	23.5	31	1	0	0	4	1023	5	71	18.3	8.1	2860	5	3	0	1	0	0
74	2015	2015-05-22	21:00:00	19.6	44.6	1	0	0	1	1031	3	17	21.6	8.1	4180	4	3	1	3	0	0
89	2015	2015-05-22	22:00:00	16.7	50.4	0	0	0	4	1033	4	17	18.4	8.2	1300	0	3	1	0	0	0
0	2015	2015-05-29	16:30:00	24.8	35.9	2	4	0	15500	1017	5	79	27.2	8.7	1750	0	0	0	0	0	0
111	2015	2015-05-29	18:35:00	20.6	45.7	4	4	0	3930	1023	5	71	22.5	8.7	1130	1	0	0	0	0	0
118	2015	2015-05-29	17:00:00	26.7	38.4	4	4	0	17200	1018	5	71	26.5	8.4	1280	4	0	0	0	0	0
119	2015	2015-05-29	18:00:00	25.1	49.4	4	4	0	10320	1020	5	71	24.3	8.4	3030	8	0	0	0	0	0
123	2015	2015-05-29	19:30:00	21.7	48.1	2	4	0	81	1024	5	71	21.5	8.7	1860	22	2	0	0	0	0
124	2015	2015-05-29	20:15:00	20.3	54	3	4	0	1	1025	4	71	20.6	8.8	1110	12	3	1	1	0	0
126	2015	2015-05-29	20:50:00	20.4	53.2	3	4	0	1	1025	3	71	20.7	8.8	870	15	2	1	2	1	0
127	2015	2015-05-29	21:20:00	20.7	55.7	1	4	0	1	1026	3	71	19.8	8.5	1620	9	3	1	1	0	0
151	2015	2015-06-03	19:50:00	20.3	53.3	4	0	0	127	1023	5	99	20	8.6	1230	5	1	0	0	0	0
153	2015	2015-06-03	19:20:00	21.5	49.4	3	0	0	1078	1021	5	99	21	8.8	1190	0	0	0	0	0	1
154	2015	2015-06-03	19:05:00	22.2	48.9	4	1	0	8730	1019	5	99	21.9	9.5	1160	3	1	0	0	0	0
159	2015	2015-06-03	18:30:00	24.7	35.7	4	2	0	43800	1016	5	99	24.9	8.6	498	4	0	0	0	0	1
162	2015	2015-05-29	23:55:00	18.5	67.8	2	4	0	1	1025	2	71	19.7	8.6	2040	25	3	1	2	0	0
165	2015	2015-05-29	22:30:00	19.2	62	0	4	0	1	1026	3	71	19.2	8.2	2640	9	1	0	0	0	0
166	2015	2015-05-29	22:50:00	20	65.7	2	4	0	1	1026	5	71	20.4	8.7	1430	16	3	1	2	0	0
177	2015	2015-06-03	22:20:00	19.5	50.69	2	0	0	1	1026	4	99	26	9	275	8	3	2	1	0	0
178	2015	2015-06-03	23:45:00	15.8	74.2	1	0	0	1	1027	4	99	17.2	9	341	2	3	2	2	0	0
182	2015	2015-06-14	22:15:00	21.1	78.3	1	0	0	1	1023	3	8	22.3	8.3	21.7	19	3	3	3	0	0
192	2015	2015-06-14	21:10:00	21.4	82	2	0	0	1	1024	3	8	22.7	8.2	236	19	3	3	3	0	0
193	2015	2015-06-14	21:40:00	20.9	78.2	0	0	1	1025	1025	3	8	22.4	8.3	262	5	3	1	2	0	0
194	2015	2015-06-14	20:45:00	21.2	85.4	0	2	0	1	1024	3	8	23.5	8.2	188	22	3	0	2	0	0
196	2015	2015-06-13	22:35:00	22.1	81.6	0	0	0	1	1023	3	15	22.5	8.2	766	1	3	3	0	0	0
197	2015	2015-06-13	22:15:00	22.3	81.8	0	0	0	1	1023	3	15	23.6	8.4	260	3	26	1	2	0	0
198	2015	2015-06-13	22:00:00	22.4	80.1	0	0	0	1	1023	3	15	22.6	8.5	438	7	3	1	1	0	0
202	2015	2015-06-13	21:50:00	23.4	74.6	4	0	0	1	1021	2	15	17.6	8.6	22.8	15	3	2	2	0	0
203	2015	2015-06-13	21:20:00	22.6	80.4	0	0	0	1	1023	2	15	22.5	8.7	658	37	3	1	0	1	0
205	2015	2015-06-14	17:40:00	28.3	50.8	4	4	0	10300	1021	5	8	22.6	8.6	412	5	0	0	0	0	0
206	2015	2015-06-14	18:50:00	24.1	63.4	3	4	0	12000	1021	5	8	24.5	9	225	14	1	0	0	0	0
207	2015	2015-06-14	18:25:00	25	62.5	4	4	0	9420	1021	5	8	25.7	8.5	390	5	1	0	0	0	0
222	2015	2015-06-21	20:50:00	20.8	68.6	1	0	0	1	1025	2	19	23.9	8.2	802	63	3	1	0	2	0
234	2015	2015-05-17	18:45:00	22.6	37.6	2	0	0	4340	1023	5	0	24.4	8.2	594	12	0	0	0	0	0
235	2015	2015-05-17	17:50:00	27.6	42.4	3	0	0	22600	1020	5	0	28.1	8.5	726	12	0	0	0	0	0
238	2015	2015-06-08	22:45:00	19.7	75.4	1	2	0	1	1025	2	69	20.7	8.7	1040	70	3	1	2	0	0
239	2015	2015-06-08	22:00:00	20.4	72.8	2	2	0	1	1025	2	69	21.8	8.7	961	58	3	2	2	0	1
240	2015	2015-06-08	21:50:00	20.4	72.8	2	2	0	1	1025	2	69	21.8	8.7	961	36	3	0	1	0	0
242	2015	2015-06-08	23:10:00	22.25	79.9	2	1	0	1	1025	2	69	20	8.4	104	24	3	0	1	0	0
243	2015	2015-06-08	23:30:00	18.5	77.1	2	2	0	1	1024	2	69	19.4	8.6	458	25	3	2	2	0	0
248	2015	2015-06-04	21:55:00	21.8	61.6	1	4	0	1	1025	3	96	20	8.5	742	19	3	0	1	0	0
250	2015	2015-06-04	21:35:00	21.8	63	0	4	0	1	1026	2	96	21.6	8.9	1370	53	3	1	1	0	0
252	2015	2015-06-04	19:50:00	22	58.4	2	4	0	3	1024	5	96	21.7	9.2	1510	46	3	0	2	0	0
0	2015	2015-06-04	19:30:00	22.3	53.5	3	4	0	149	1021	5	96	22.1	9.9	1390	0	1	0	2	0	0
253	2015	2015-06-04	20:30:00	22.3	61.4	0	4	0	1	1025	3	96	21.4	8.5	1490	49	3	2	2	0	0
255	2015	2015-06-04	20:45:00	22.1	62.4	0	4	0	1	1025	3	96	21.1	8.4	1380	93	3	2	2	0	0
259	2015	2015-05-17	19:40:00	21.7	33.8	0	0	0	120	1020	4	0	17.2	8.7	149	4	3	1	0	0	0
263	2015	2015-05-17	20:50:00	20.4	44	1	0	0	1	1028	2	0	19.4	8	366	11	3	2	0	0	0
266	2015	2015-05-17	20:15:00	20.4	33.6	1	0	0	2	1027	3	0	20	8.2	411	5	3	1	0	0	1
268	2015	2015-05-23	18:30:00	24.9	27.3	1	0	0	4100	1026	5	25	23.5	8.7	358	41	1	0	2	0	1
269	2015	2015-05-24	17:00:00	26.6	23.5	4	0	0	55600	1021	5	34	27.6	8.1	446	1	0	0	0	0	1
270	2015
276	2015	2015-05-25	17:45:00	23.9	26.1	3	0	0	27500	1024	5	34	26.1	8.3	972	18	0	0	0	0	0
278	2015	2015-05-24	18:10:00	23.7	33.9	3	0	0	38100	1025	5	34	22.8	8.4	522	6	0	0	0	0	0
279	2015	2015-05-24	18:30:00	21.5	38.6	3	0	0	19780	1026	5	34	21	8.3	845	20	0	0	0	0	0
280	2015	2015-05-24	18:15:00	20.3	32.7	3	0	0	2230	1028	5	34	21.4	8.9	4.75	5	0	0	2	0	0
281	2015	2015-05-24	19:55:00	17.4	36.2	3	0	0	13	1028	5	34	17.2	8.5	772	1	3	1	0	0	1
282	2015	2015-05-24	19:35:00	19.6	33.1	4	0	0	236	1028	5	34	18.7	8.8	884	3	2	0	2	0	0
284	2015	2015-05-24	20:35:00	20.35	37.5	4	1	0	2	1030	3	34	17.6	8.3	861	2	3	1	2	0	0
286	2015	2015-06-14	18:40:00	24.4	64.6	2	4	0	5310	1022	5	8	22.7	8.8	199	7	1	0	0	0	0
287	2015	2015-06-14	19:20:00	23.4	66.6	1	4	0	934	1020	5	8	24.1	8.1	947	36	3	0	1	0	0
291	2015	2015-06-14	10:48:00	22.8	73	1	4	0	372	1021	5	8	24.7	8	303	2	1	0	1	0	0
292	2015	2015-06-14	20:00:00	22.4	75	0	4	0	7	1021	5	8	24.3	8.6	107	109	3	1	3	0	0
300	2015	2015-06-08	23:30:00	19.1	76.4	0	0	0	1	1019	2	57	18.7	8.4	475	0	3	3	1	0	0
307	2015	2015-06-08	22:45:00	18.8	82.5	3	0	0	1	1019	2	57	21.9	8.3	393	1	3	1	0	0	0
308	2015	2015-06-08	23:00:00	18.6	81.3	2	0	0	1	1019	2	57	18.3	8.4	332	3	3	3	1	0	0
309	2015	2015-06-09	22:45:00	19.4	79.5	2	0	0	1	1020	2	57	20.9	8.5	380	30	3	2	1	0	0
319	2015	2015-06-09	18:55:00	25.4	50.8	4	4	0	8760	1015	5	87	25.2	8.5	291	9	0	0	0	0	0
339	2015	2015-06-09	17:35:00	28.4	42.1	3	4	0	24100	1008	5	57	28.2	9.2	263	32	0	0	0	0	1
0	2015
340	2015	2015-06-09	18:00:00	27.6	51.2	4	4	0	28300	1010	5	57	27.2	8.5	559	47	0	0	0	0	0
0	2015	2015-06-09	18:15:00	27.3	51.2	4	4	0	26400	1010	5	57	27.2	8.5	847	7	0	0	0	0	1
341	2015	2015-06-09	17:20:00	27.3	49	4	4	0	25600	1009	5	57	28	9.8	312	1	0	0	0	0	0
386	2015	2015-06-09	21:50:00	21	71.2	4	0	0	1	1020	2	57	23.6	8.3	850	39	3	3	0	0	0
403	2015	2015-06-09	20:35:00	23.3	55.4	4	2	0	1	1019	3	57	23.3	9	333	68	3	1	0	0	0
404	2015	2015-06-08	20:25:00	20.6	70.3	3	3	0	1	1023	3	69	21.3	9	1420	3	3	0	0	0	0
405	2015	2015-06-08	20:35:00	20.1	70.9	3	3	0	1	1023	2	69	20.9	8.9	967	4	3	0	1	0	0
406	2015	2015-06-08	20:00:00	21	70.9	2	2	0	12	1023	4	69	22.2	8.5	1260	15	3	1	2	0	0
407	2015	2015-06-08	19:35:00	21.1	70.3	4	4	0	191	1022	5	69	22.7	8.2	1950	45	3	0	20	1	0
408	2015	2015-06-08	19:00:00	22.3	64.5	2	4	0	2400	1022	5	69	23.2	8.6	742	3	0	0	0	1	0
409	2015	2015-06-08	18:45:00	23.2	59.1	2	4	0	5730	1021	5	69	24.3	8.6	760	3	0	0	0	0	0
410	2015	2015-05-27	17:40:00	33.6	24.1	2	0	0	45300	1021	5	62	29.7	7.7	486	0	1	0	1	0	0
411	2015	2015-05-26	19:20:00	29	49.2	3	2	0	968	1030	5	53	20.7	9	269	69	0	0	0	1	0
412	2015	2015-06-05	22:10:00	16.4	77.6	0	0	0	1	1030	3	94	16.6	8.7	816	19	3	1	2	1	0
413	2015	2015-06-05	22:30:00	15.7	81.3	0	0	0	1	1030	3	94	17.5	8.4	663	0	3	2	0	3	0
414	2015	2015-06-05	21:50:00	16.1	77.8	0	0	0	1	1029	3	94	17	8.5	408	3	1	1	0	0	0
415	2015	2015-06-05	21:20:00	15.7	72.8	2	0	1	1	1029	3	94	16.5	8.3	463	5	31	1	0	0	0
416	2015	2015-06-05	18:10:00	20.1	49.2	2	3	0	38100	1025	5	94	21	9	261	65	0	0	0	0	0
417	2015	2015-06-05	20:30:00	16.4	67.6	0	0	0	1	1026	3	94	17.7	8.4	669	6	3	0	1	0	0
418	2015	2015-05-26	17:00:00	21.8	25.2	4	0	0	40300	1022	5	45	23.8	9	380	61	0	0	0	0	0
419	2015	2015-05-26	17:15:00	27.6	27.8	2	0	0	37900	1024	5	53	27.9	8.9	290	96	0	0	0	0	0
420	2015	2015-05-26	17:45:00	26.7	36.4	2	0	0	25400	1024	5	53	26.1	8.1	957	87	1	0	0	0	0
421	2015	2015-05-26	18:15:00	25.1	39.6	1	0	0	8310	1025	5	53	22.8	8.4	438	16	0	0	0	3	0
422	2015	2015-05-26	18:40:00	24.4	43.1	2	1	0	7210	1026	5	53	21.6	8.6	271	55	0	0	1	0	0
423	2015	2015-05-26	19:00:00	21	58.4	3	2	0	3730	1027	5	53	22.8	8.2	450	46	1	0	0	0	0
424	2015	2015-05-26	19:40:00	20	50.3	1	3	0	165	1030	5	53	19.7	8.8	354	1	3	0	1	0	0
425	2015	2015-05-26	21:15:00	15.3	84.9	1	0	0	1	1032	2	53	17.5	7.9	538	1	3	0	0	0	0
426	2015	2015-05-26	22:50:00	16.2	84.2	0	0	0	1	1034	2	53	18	8.3	177	64	3	1	2	0	0
427	2015	2015-05-26	23:45:00	15.9	80.7	1	0	0	1	1034	2	53	17.4	8.3	111	5	3	1	1	0	0
428	2015	2015-06-06	16:15:00	31.4	34	1	0	0	57600	1018	5	87	33.1	9.3	88	2	0	0	0	0	0
429	2015	2015-06-07	17:50:00	25.8	48.2	3	0	0	51200	1024	5	79	27.2	8.8	670	11	0	0	0	0	0
430	2015	2015-06-07	18:05:00	25.3	48.3	3	0	0	34200	1024	5	79	26.3	8.8	690	6	0	0	0	0	0
1	2016	2016-06-02	18:50:00	23.2	51.01	2	1	0	95200	1012.5	5	11	25.3	9.8	272	25
2	2016	2016-06-02	19:20:00	22.8	54.38	1	1	0	1971	1012.8	5	11	22.1	7.5	360	9			1
7	2016	2016-06-02	20:10:00	22.7	53.21	1	1	0	173	1013.8	5	11	22.9	8.1	321	7					1
10	2016	2016-06-02	20:40:00	22	65.3	1	1	0	1	1014	4	11	21.5	7.7	301	1	3	0	1	0	1
11	2016	2016-06-11	20:45:00	21.8	67.51	1	0	0	1	1014.2	3	11	23	8.7	275	32	3	1	1	0	0
13	2016	2016-06-02	22:00:00	21.4	75.43	1	0	0	1	1014.4	3	11	22.7	7.9	286	29	3	1	1	0	1
19	2016	2016-06-02	21:30:00	21.3	76.42	0	0	0	1	1015	3	11	22.5	8.1	660	18	3				0
22	2016	2016-06-02	23:15:00	20.7	77.86	0	0	0	1	1015.6	3	11	21.5	9.2	313	13	3	1	1	0	0
23	2016	2016-06-02	23:30:00	20	82.6	0	0	0	1	1015.6	2	11	18.4	7.6	588	24	3	1	2	0	0
24	2016	2016-06-02	23:50:00	20.4	85.73	0	0	0	1	1015.5	2	11	18.5	7.3	499	13	3	3	2	0	0
27	2016	2016-06-02	23:20:00	21.77	73.46	2	0	0	1	1013.8	3	8	22.6	8.2	430	3	3	3	2	0	1
35	2016	2016-06-07	23:55:00	20.05	83.31	1	0	0	1	1013.9	3	8	21.8	7.7	794	0	2	1	0	0	0
36	2016	2016-06-08	00:15:00	19.48	85.46	1	0	0	1	1014	3	8	18.4	8.2	518	2	3	2	1	0	0
50	2016	2016-05-29	22:00:00	20.5	76.4	0	0	0	1	1008.8	3	61	21.2	9.1	534	11	3	2	2	0	0
54	2016	2016-05-29	23:20:00	20.5	84.56	1	0	0	1	1009.7	3	61	18.1	8.5	485	3	3	2	2	0	1
64	2016	2016-05-24	20:00:00	18.58	71.52	2	4	0	106	1011.9	5	94	16.7	8.4	505	30					0
65	2016	2016-05-24	20:40:00	16.17	81.75	3	4	0	1	1011.9	3	94	17.1	8.5	460	25	3	1	2	0	0
69	2016	2016-05-29	18:00:00	22.1	68.8	3	4	0	15331	1007	5	51	23.6	8.9	385	27	1			1	0
70	2016	2016-05-29	20:00:00	22.5	79.9	0	0	0	39	1008	5	61	21	9.1	934	3	3				0
0	2016	2016-05-29	23:50:00	20.1	70.4	0	0	0	1	1009.3	3	61	20.5	8.3	576	0	3	2	1	0	1
0	2016	2016-05-24	18:30:00	20.48	70.13	2	4	0	9740	1010.2	5	94	19.6	9.5	558	3					1
74	2016	2016-05-28	01:35:00	19.8	86.78	1	4	0	1	1014.3	3	70	20.1	8.4	2150	9	3	2	3	0	0
89	2016	2016-06-04	01:00:00	20.8	63.41	1	4	0	1	1011.5	4	4	20.9	7.5	782	0	2	1	0	0	0
0	2016	2016-06-08	22:15:00	20.34	85.78	3	0	0	1	1015	1	12	22.7	8.2	1740	15	3	3	1	0	0
111	2016	2016-06-11	22:30:00	25.29	75.84	1	4	0	1	1013.5	2	40	23.4	7.9	1050	31	3	3	3	2	0
118	2016	2016-06-11	23:15:00	24.45	80.21	0	4	0	1	1013.4	2	40	25.4	7.8	2216	47	3	1	2	0	0
119	2016	2016-06-11	22:50:00	24.5	80.73	0	4	0	1	1013.5	2	40	24.7	8.3	1360	27	3	1	2	0	0
123	2016	2016-06-11	21:45:00	25.15	75.29	0	4	0	1	1013.7	3	40	23.6	7.9	1570	35	3	3	2	1	0
124	2016	2016-06-11	20:45:00	25.78	75.11	0	0	0	1	1012.9	2	40	24.1	8.1	1460	27	3	3	3	1	1
126	2016	2016-06-11	19:55:00	25.48	74.07	1	4	0	5	1012.6	5	40	23.7	8.2	880	53	3			1	0
127	2016	2016-06-11	19:15:00	25.62	71.88	1	4	0	448	1012	5	40	26.7	8.3	1030	7	3				0
151	2016	2016-05-28	00:20:00	19.7	94.6	1	4	0	1	1013.7	3	70	20.2	8.5	640	16	3	2	2	0	0
153	2016	2016-06-11	18:00:00	28.39	61.29	3	4	0	33100	1012	5	40	25.9	8.5	885	0					1
154	2016	2016-06-11	17:50:00	29.65	57.01	3	4	0	35100	1011.9	5	40	27	8.3	1000	1					0
159	2016	2016-06-11	17:00:00	29.63	57.44	3	4	0	51600	1011.8	5	40	26	8.4	1140	3					0
162	2016	2016-06-11	00:30:00	22.31	76.49	1	0	0	1	1015.2	3	33	22.4	8.1	1740	22	3	1	1	1	0
165	2016	2016-06-11	19:10:00	25.58	68.79	1	4	0	2710	1012.3	5	40	27	8	292	4					1
166	2016	2016-06-10	23:00:00	22.78	72.15	2	0	0	1	1014.9	3	33	21.8	8	1270	41	3	2	2	1	0
177	2016	2016-06-16	18:50:00	22.45	70.47	3	4	0	2960	1000.2	5	85	25.2	8	853	1					1
178	2016	2016-06-16	19:30:00	22.59	69.56	1	4	0	331	1001.9	5	85	21	8.3	339	0					1
182	2016	2016-06-03	21:00:00	22.4	56.63	0	4	0	1	1011	2	4	20.5	7.9	640	16	3	1	0	0	0
192	2016	2016-06-03	22:20:00	21.4	73.3	0	4	0	1	1012.5	2	4	21.7	8	291	10	3	2	1	0	0
193	2016	2016-06-03	22:00:00	20.9	64.31	1	4	0	1	1013.3	2	4	20.6	7.9	469	0	3	3	2	0	0
194	2016	2016-06-03	22:45:00	21.5	74.85	0	4	0	1	1012.7	3	4	22.3	7.6	310	8	3	3	1	0	0
196	2016	2016-06-15	22:30:00	21.78	78.43	1	0	0	1	1006.1	2	85	21.9	8.2	593	2	3	1	1	0	0
197	2016	2016-06-15	23:00:00	20.39	80.48	1	0	0	1	1006.9	2	85	21.6	8.4	376	2	3	1	1	0	0
198	2016	2016-06-15	23:10:00	20.59	80.7	1	2	0	1	1007.4	3	85	21.1	7.8	500	5	3	1	2	0	0
202	2016	2016-05-27	23:10:00	20.3	78.53	0	4	0	1	1013.9	3	70	18.3	8.4	559	1	3	2	1	2	0
203	2016	2016-05-27	22:40:00	20.2	79.63	0	4	0	1	1014.1	3	70	20.5	8.4	626	13	2	0	0	1	0
205	2016	2016-06-03	23:30:00	20.9	83.4	0	4	0	1	1013.9	2	4	21.4	7.7	870	5	3	1	1	0	0
206	2016	2016-05-27	22:00:00	20.9	73.4	0	4	0	1	1012.7	3	70	22.3	8.8	469	20	3	1	1	0	0
207	2016	2016-06-16	21:05:00	20.85	80.85	2	0	0	1	1006.2	2	85	22	8.2	425	8	3	2	2	0	0
222	2016	2016-06-16	00:05:00	21.91	73.78	0	4	0	1	1006.5	3	85	21.1	8	1020	18	2	0	0	0	0
234	2016	2016-06-08	17:50:00	26.57	53.87	2	4	0	11300	1010.1	5	12	26.3	7.9	1080	7	1				0
235	2016	2016-06-09	17:00:00	27.72	49.96	1	1	0	23800	1008.5	5	13	27.3	8.3	309	1					1
238	2016	2016-06-15	23:00:00	22.51	83.84	1	4	0	7	1003.6	3	78	22.3	8.2	1190	104	3	2	3	0	0
239	2016	2016-06-15	22:30:00	22.2	84.2	1	4	0	1	1003.8	3	78	22.5	8.14	945	63					0
240	2016	2016-06-15	22:00:00	22.66	82.59	2	4	0	1	1002.1	2	78	20.6	8	1230	74	3	2	0	0	0
242	2016	2016-06-16	01:00:00	20.03	83.32	1	4	0	1	1008.4	2	85	20.4	7.6	1620	16	3	0	2	0	0
243	2016	2016-06-15	00:40:00	19.87	81.67	0	4	0	3	1003.2	3	85	22.1	7.9	657	11	3	1	2	0	1
248	2016	2016-06-15	21:30:00	22.46	83.84	4	4	0	1	1003.2	3	78	21	8	1150	25	3	1	1	0	0
250	2016	2016-06-15	20:50:00	23.3	80.63	4	4	0	1	1003.7	2	78	29.7	8	3930	106	2	1	0	0	0
252	2016	2016-06-08	21:10:00	20.61	84.94	3	0	0	1	1014.7	2	12	21.4	8.7	1010	158	3	3	3	0	0
0	2016	2016-06-08	21:00:00	20.12	87.84	3	0	0	1	1014.1	3	12	21.8	8.1	1200	32	3	3	1	0	0
253	2016	2016-06-12	19:40:00	23.49	79.41	0	5	0	14	1007.5	5	51	25.2	7.9	1410	105			1		0
255	2016	2016-06-12	20:10:00	23.47	73.83	0	4	0	3	1006.8	4	51	24.7	8.1	481	131	3	1	2	0	0
259	2016	2016-06-08	18:20:00	24.96	60.86	2	4	0	12060	1010	5	12	25	8.6	820	3			1		0
263	2016	2016-06-08	19:40:00	22.17	68.76	1	0	0	28	1012.4	5	12	21.9	8.9	859	10	3	0	1	0	0
266	2016	2016-06-08	19:30:00	23.59	63.09	1	1	0	739	1011.9	5	12	23	7.9	451	3					1
268	2016	2016-05-31	21:30:00	21.9	83.76	1	0	0	1	1011.8	3	28	21.6	10.1	296	37	3	2	1	0	1
269	2016	2016-05-31	23:00:00	19.1	83.85	1	0	0	1	1011.2	3	28	20.4	9.5	478	2	3	2	1	0	1
270	2016	2016-06-01	19:10:00	25.2	45.8	1	1	0	1378	1010.4	5	19	24	10.2	939	24	1		2		0
276	2016	2016-06-01	19:40:00	23.9	58.5	1	2	0	153	1010.8	5	19	23.4	8.4	1560	41			2		0
278	2016	2016-06-01	20:10:00	21.8	63.8	2	1	0	1	1011.5	4	19	21.1	8.8	750	13	3	0	1	0	1
279	2016	2016-06-01	21:00:00	21.8	76.4	0	0	0	1	1012.3	2	19	21.7	8.8	893	51	3	3	3	1	0
280	2016	2016-06-01	21:45:00	21.6	79.4	2	0	0	1	1012.8	2	19	20.6	8.5	1220	39	3	3	4	0	0
281	2016	2016-06-01	22:10:00	20.8	69.21	1	0	0	1	1012.7	2	19	21.9	8.6	897	18	3	1	2	0	0
282	2016	2016-06-01	22:30:00	20.7	76.4	0	0	0	1	1013.1	2	19	21.8	8.6	692	48	3	1	2	0	0
284	2016	2016-06-01	23:20:00	20.7	79.53	0	0	0	1	1012.5	2	19	21.3	8.5	1160	1	3	3	3	0	0
286	2016	2016-06-16	21:50:00	20.96	81.79	0	4	0	1	1005.5	3	85	27.3	7.9	423	4	31	3	0	0	0
287	2016	2016-05-27	21:15:00	20.8	59.57	1	2	0	1	1010.7	2	71	22.8	8.7	267	28	3	1	2	0	0
291	2016	2016-06-16	20:30:00	21.76	76.33	1	4	0	1	1002.2	3	85	21.9	8	360	1	3	1	2	0	0
292	2016	2016-06-16	21:00:00	20.71	81.52	2	4	0	1	1002.4	3	85	24.3	8	292	86	3	3	3	0	0
300	2016	2016-05-28	23:45:00	18.2	86.43	1	0	0	1	1001.5	2	61	20.2	8.5	346	0	3	3	3	0	0
307	2016	2016-05-28	22:45:00	19	86.43	0	0	0	1	1003.3	3	61	19	7.2	330	3	3	1	1	0	0
308	2016	2016-05-28	23:10:00	19.2	84.09	0	0	0	1	1003.2	3	61	18.2	8.7	424	4	2	1	1	0	0
309	2016	2016-05-28	22:10:00	22.8	75.83	1	0	0	1	1003.8	2	61	21.7	8.4	467	20	3	1	1	0	0
319	2016	2016-06-14	01:00:00	22.56	79.6	1	2	0	1	1001	2	71	21.1	8.2	267	7	3	2	0	0	0
339	2016	2016-06-14	23:20:00	23.83	72.06	0	4	0	1	998.4	3	71	21.2	8.1	492	0	3	2	0	0	1
0	2016	2016-06-14	23:00:00	23.68	70.93	1	4	0	1	977.7	2	71	21.5	8.2	387	22	3	3	0	0	1
340	2016	2016-06-15	00:05:00	23.84	71.14	0	4	0	1	998.5	2	71	24.2	8.2	499	42	3	3	0	0	0
0	2016	2016-06-15	00:30:00	23.94	72.3	0	4	0	1	997.8	2	71	24.3	8.2	339	8	3	2	0	0	0
341	2016	2016-06-14	23:10:00	23.36	74.93	1	0	0	1	998.5	2	71	25	8	733	1	3	3	0	0	1
386	2016	2016-05-28	21:10:00	23.3	75.4	0	0	0	1	1004.6	4	61	22.4	8.7	369	36	3	1	1	0	0
403	2016	2016-05-28	19:00:00	22.3	67.34	2	4	0	158	1004.4	5	61	21.4	9	328	72					0
404	2016	2016-06-12	22:00:00	21.22	89	1	4	0	1	1008.3	2	51	22.9	8.1	1280	6	3	2	3	0	0
405	2016	2016-06-12	22:40:00	20.21	87.62	0	4	0	1	1008.5	2	51	21.8	8.7	5720	2	3	3	1	0	0
406	2016	2016-06-12	23:30:00	20.85	87.2	0	4	0	1	1008	2	51	20.1	8.2	773	17	3	3	3	0	0
407	2016	2016-06-12	23:45:00	20.83	87.07	2	4	0	1	1007.8	5	21	20.8	7.8	1870	15	3	2	1	0	0
408	2016	2016-06-13	00:15:00	20.11	87.93	2	4	0	1	1007.6	2	51	21	8.5	690	3	3	3	3	1	1
409	2016	2016-06-13	00:40:00	20.41	88.37	2	4	0	1	1007.1	1	51	22.5	8.1	786	2	3	3	1	0	0
410	2016	2016-06-01	23:50:00	20.6	76.5	1	0	0	1	1012.1	2	19	22.6	8.6	505	4	3	3	3	0	0
411	2016	2016-06-05	23:20:00	20.8	91.4	0	0	0	1	1016.5	2	0	20.7	7.9	362	46	3	1	1	1	0
412	2016	2016-06-06	23:50:00	21.1	94.6	0	0	0	1	1016.8	2	0	21.5	8	420	17	3	3	1	2	0
413	2016	2016-06-06	17:15:00	21.9	68.4	3	4	0	3450	1014.9	5	2	21.2	8.2	83.5	2		1		1	0
414	2016	2016-06-06	18:20:00	22.5	72.4	2	4	0	645	1015.5	5	2	20.5	8.42	3390	1	0	0	3	1	0
415	2016	2016-06-06	19:45:00	21.4	78.9	1	4	0	38	1015.9	5	2	20.6	7.7	505	1	0	1	0	1	0
416	2016	2016-05-26	21:40:00	20.9	61.4	0	0	0	1	1014.7	3	80	21.8	8.4	246	63	3	3	3	1	0
417	2016	2016-06-06	20:15:00	22.1	76.48	1	4	0	9	1014.7	5	2	20.7	8	352	7	3	1	2	3	0
418	2016	2016-06-05	21:15:00	21.2	87.9	1	4	0	1	1016	2	0	24.3	7.8	431	51	3	1	1	1	0
419	2016	2016-05-25	23:10:00	18.53	84.48	0	0	0	1	1015.7	3	87	18.3	8.1	508	94	3	3	1	0	0
420	2016	2016-06-05	20:40:00	21.4	81.4	2	4	0	1	1015.2	2	0	22.4	8.1	404	76	3	0	0	0	0
421	2016	2016-05-25	22:30:00	18.05	88.95	1	0	0	1	1015.6	3	87	18.1	9	356	22	3	3	2	2	0
422	2016	2016-06-05	19:55:00	22.5	74.6	2	4	0	6	1014.6	5	0	22.9	8	386	35					0
423	2016	2016-06-05	19:40:00	23.3	58.4	1	3	0	366	1014.1	5	0	25.2	7.9	796	25					0
424	2016	2016-06-05	19:10:00	24.1	63.41	3	3	0	2030	1014.3	5	0	24.2	8.7	956	1			1		0
425	2016	2016-06-05	18:40:00	24.2	58.2	2	3	0	4040	1014.1	5	0	23.6	7.7	160	1					1
426	2016	2016-06-05	21:40:00	18.09	91.85	1	0	0	1	1015.4	3	87	22.1	8.4	275	66	3	3	3	1	0
427	2016	2016-05-25	20:00:00	21.08	77.81	1	0	0	1	1014.4	3	86	22.1	8.9	158	1	3	1	0	0	0
428	2016	2016-06-05	18:00:00	25.9	63.4	2	3	0	7510	1012	5	0	26.1	9.9	128	1					0
429	2016	2016-06-05	23:00:00	21.5	86.43	0	0	0	1	1016.6	2	0	22.1	7.9	541	1	3	2	2	3	0
430	2016	2016-06-05	22:10:00	21.4	81.4	0	0	0	1	1016.5	3	0	21.8	8.1	585	1	3	1	1	0	0
1	2017	2017-05-30	19:10:00	25	62.3	0	2	0	1050	1003.8	5	30	22.2	9.14	920	17	3	2	1	0	0
2	2017	2017-05-30	19:30:00	24.7	57.6	1	2	0	749	1003.8	5	30	23.4	8.92	836	4	1	0	1	0	0
7	2017	2017-05-30	20:05:00	23	32.5	0	2	0	9	1004.7	4	30	21.5	8.73	801	3	3	1	1	0	1
10	2017	2017-05-30	20:20:00	28.4	56.5	0	2	0	2	1004.7	3	30	20.9	8.88	743	0	3	1	1	0	1
11	2017	2017-05-30	20:30:00	22.1	46.8	1	0	0	2	1004.5	2	30	21.7	8.35	1150	21	3	2	2	0	1
13	2017	2017-05-30	21:00:00	21	61.2	2	0	0	2	1004.3	2	30	19.8	8.61	970	33	3	1	1	0	1
19	2017	2017-05-30	20:40:00	21.6	61.4	2	0	0	2	1004.5	2	30	20.6	8.04	442	17	3	3	2	0	0
22	2017	2017-05-30	21:25:00	18.4	72.2	1	0	0	2	1005.2	3	30	19.5	9.68	993	25	3	1	1	0	0
23	2017	2017-05-30	21:10:00	20.6	67.9	2	2	0	2	1004.3	2	30	19.4	8.14	964	28	3	3	2	0	0
24	2017	2017-05-30	21:35:00	20.6	68.2	0	0	0	2	1005.2	2	30	19.4	9.43	1030	17	3	3	2	0	0
27	2017	2017-05-30	21:50:00	18.7	72.9	0	0	0	2	1005.2	2	30	20.3	8.51	1030	3	3	1	1	0	1
35	2017	2017-05-30	22:00:00	18.4	77	1	0	0	2	1005.2	2	30	20	8.43	901	0	3	3	3	0	1
36	2017	2017-05-30	22:15:00	17.5	82.8	1	0	0	2	1005.4	2	30	18.4	8.72	743	1	3	3	1	0	1
50	2017	2017-05-22	22:20:00	16.4	62.4	0	0	0	2	1010.1	3	14	20.4	8.09	404	4	3	3	2	0	0
54	2017	2017-05-22	22:55:00	18.2	55.4	0	0	0	5	1010	3	14	19.1	8.81	1030	1	3	1	1	0	1
64	2017	2017-05-22	21:35:00	17.5	64.9	1	0	0	2	1010.3	2	14	19.9	8.24	3140	25	3	3	2	2	0
65	2017	2017-05-22	21:15:00	18.7	66.9	1	0	0	1	1010.2	2	14	22	8	835	23	3	3	2	1	0
69	2017	2017-05-22	19:30:00	17.5	68.7	1	0	0	26	1009.4	5	14	20.8	7.76	892	25	3	1	1	1	0
70	2017	2017-05-22	20:20:00	18.6	59.8	1	0	0	2	1009.9	2	14	20	8.19	1340	5	3	3	0	1	0
0	2017	2017-05-22	23:30:00	18.9	52.1	0	0	0	2	1009.9	3	14	18.3	7.31	639	0	3	3	1	0	0
0	2017	2017-05-22	23:50:00	17.3	55.5	0	0	0	2	1010	3	14	18.5	8.66	654	2	3	1	3	0	0
74	2017	2017-05-24	01:00:00	18.2	37.6	1	4	1	2	1006.1	2	7	19.2	7.77	2770	6	3	3	3	0	0
89	2017	2017-05-25	19:00:00	21.1	63.7	3	1	0	2640	999	5	0	19.9	9.33	556	0	1	0	0	0	1
0	2017	2017-05-28	16:20:00	25.5	56.3	2	1	0	33200	1006.8	5	12	29.1	8.82	1710	3	0	0	0	0	0
111	2017	2017-05-28	17:00:00	25.9	54.9	1	1	0	40500	1006.6	5	12	29.1	8.42	3860	17	0	0	0	0	0
118	2017	2017-05-28	17:45:00	25	51.9	3	1	0	14300	1006.6	5	12	28.4	8.43	3070	26	0	0	0	0	0
119	2017	2017-05-28	17:30:00	25.6	53.3	2	1	0	28700	1006.5	5	12	28.8	8.59	5750	5	0	0	0	0	0
123	2017	2017-05-28	18:00:00	24.6	58.1	3	0	0	10940	1006.6	5	12	24.1	8.44	2390	34	0	0	0	0	0
124	2017	2017-05-28	18:10:00	23.6	61.2	0	1	0	7820	1006.8	5	12	22.1	8.35	1840	21	0	0	0	0	0
126	2017	2017-05-28	18:45:00	23.1	61.6	2	0	0	5660	1007	5	12	23.1	8.85	1540	22	0	0	0	0	0
127	2017	2017-05-28	19:00:00	22.9	64.4	1	0	0	2610	1007.1	5	12	25.4	7.89	869	6	0	0	0	0	0
151	2017	2017-05-28	21:00:00	19.8	73.7	2	0	0	2	1007.9	2	12	22	8.71	1130	32	3	1	1	0	0
153	2017	2017-05-28	20:45:00	20.4	73.3	2	0	0	2	1007.9	2	12	21.4	7.85	1750	0	3	0	1	0	0
154	2017	2017-05-28	20:30:00	20.6	71.2	2	0	0	2	1008	2	12	20.3	8.63	747	2	3	1	1	0	0
159	2017	2017-05-28	20:00:00	21	69	3	0	0	62	1007.7	5	12	22.4	8.83	2450	8	3	0	0	0	1
162	2017	2017-05-28	17:40:00	21.9	67.8	2	0	0	78	1007.9	5	12	24.3	8.12	643	6	19	1	0	0	0
165	2017	2017-05-28	19:10:00	22.7	65	2	0	0	2970	1007.2	5	12	23.5	8.66	1690	2	0	0	0	0	1
166	2017	2017-05-28	19:30:00	22.2	66.4	2	0	0	1608	1007.6	5	12	22.4	8.39	1690	24	0	0	1	0	0
177	2017	2017-05-25	20:15:00	17.4	56.5	3	0	0	2	999	4	0	16.8	7.66	520	1	3	0	0	0	1
178	2017	2017-05-25	20:00:00	18.9	52.3	2	1	0	10	999	5	0	18.5	7.45	806	0	3	0	1	0	1
182	2017	2017-05-23	19:10:00	21.7	53.2	2	4	0	683	1002.1	5	7	22.3	8.18	307	14	3	1	1	0	0
192	2017	2017-05-23	19:40:00	22.4	65.8	0	4	0	50	1004	5	7	23.1	8.93	304	8	3	0	1	0	1
193	2017	2017-05-23	20:05:00	22.1	65.5	1	4	0	5	1003.9	4	7	22.5	7.89	367	0	3	1	1	0	1
194	2017	2017-05-23	20:40:00	21	58.1	0	4	0	2	1004.5	3	7	21.6	8.75	260	21	3	1	1	0	0
196	2017	2017-05-27	20:20:00	18.4	50.6	1	0	0	2	1008	4	5	19.1	8.46	546	1	3	0	0	0	0
197	2017	2017-05-27	20:35:00	19.8	44	1	0	0	2	1008.4	2	5	19.3	8.57	494	13	3	0	0	0	1
198	2017	2017-05-27	20:55:00	18.9	48.2	1	0	0	2	1009	2	5	17.8	8.22	71.9	5	3	1	0	0	1
202	2017	2017-05-27	22:00:00	17.2	59.6	1	0	0	2	1010	2	5	20.2	7.98	1050	0	3	1	1	0	1
203	2017	2017-05-27	21:30:00	18.7	47.9	0	0	0	2	1009.8	2	5	18.7	8.19	754	1	2	1	0	0	0
205	2017	2017-05-23	23:30:00	19.8	88.2	1	4	1	2	1005.9	2	7	20.2	8.26	510	3	3	1	1	0	0
206	2017	2017-05-23	23:10:00	19.4	69.9	1	4	0	2	1005.5	2	7	20.1	7.87	1020	18	3	1	1	0	0
207	2017	2017-05-23	22:50:00	20.4	55.8	1	4	0	2	1005.4	2	7	20.5	7.86	575	14	3	1	1	0	0
222	2017	2017-05-29	16:00:00	33.4	41.8	2	0	0	50500	1000.4	5	20	29.4	7.8	760	22	0	0	0	0	0
234	2017	2017-05-24	19:45:00	20.8	64.6	0	0	0	61	1002.2	5	2	22.2	7.92	1170	3	3	0	1	0	0
235	2017	2017-05-24	19:30:00	21.9	45.6	1	0	0	609	1000.7	5	2	25.1	8.2	545	7	1	1	1	0	0
238	2017	2017-05-29	16:30:00	36.6	37.7	1	0	0	43900	1006.7	5	20	31.64	7.91	847	101	1	0	1	0	0
239	2017	2017-05-29	16:45:00	30.3	45.7	2	0	0	48800	1006.7	5	20	31.6	8.71	1710	71	0	0	0	0	0
240	2017
242	2017	2017-05-29	16:20:00	31	47.8	2	0	0	51300	1006.8	5	20	32.7	8.41	2260	6	1	0	0	0	1
243	2017	2017-05-29	16:10:00	33.3	422	1	0	0	54300	1006.4	5	20	32.6	8.1	655	2	0	0	0	0	1
248	2017	2017-05-28	18:15:00	28.1	55	3	0	0	28100	1007	5	20	30.4	7.98	1070	24	0	0	0	0	0
250	2017	2017-05-29	17:30:00	28	55.4	2	0	0	18200	1007.7	5	20	28.3	8.63	2060	107	0	0	0	0	0
252	2017	2017-05-29	18:15:00	26.3	57.6	2	0	0	16900	1007.6	5	20	28.4	7.53	473	143	1	0	1	0	0
0	2017	2017-05-29	18:30:00	25.7	58.9	3	0	0	10730	1007.8	5	20	26.4	8.79	3380	2	0	0	0	0	1
253	2017	2017-05-29	18:05:00	27.8	50.2	3	0	0	13700	1007.5	5	20	27.2	8.05	1750	107	0	0	0	0	0
255	2017	2017-05-29	17:50:00	28.3	50.1	1	0	0	15600	1007.4	5	20	29.1	8.01	1260	151	0	0	0	0	0
259	2017	2017-05-24	20:30:00	20.9	67.8	0	0	0	2	1002.3	3	2	20.9	7.8	300	1	3	0	1	0	0
263	2017	2017-05-24	20:56:00	19.2	61	0	0	0	2	1003.9	2	2	22.5	7.73	540	7	3	3	2	0	1
266	2017	2017-05-24	21:15:00	19.6	62.7	0	0	0	2	1004.3	3	2	22.6	7.76	423	3	3	2	2	1	0
268	2017	2017-05-24	21:35:00	19.3	55.9	0	0	0	2	1005.3	2	2	20.8	7.43	2800	46	3	3	1	0	0
269	2017	2017-05-29	21:00:00	20.5	71.7	0	0	0	2	1008.2	3	20	22.9	8.24	579	1	3	0	0	0	1
270	2017	2017-05-29	20:35:00	22.6	66	0	0	0	2	1008.2	3	20	21.9	7.41	1064	24	3	1	1	0	0
276	2017	2017-05-29	20:20:00	21.8	69.7	0	0	0	3	1008.1	4	20	22.8	9.52	1230	65	3	1	1	0	0
278	2017	2017-05-29	20:05:00	22.6	65.4	0	0	0	13	1008.3	4	20	22.9	8.01	798	5	3	1	1	0	1
279	2017	2017-05-29	19:10:00	24.6	59.1	2	0		2340	1008.3	5	20	26.4	7.88	1040	21	1	0	1	0	1
280	2017	2017-05-29	19:50:00	23.3	65.2	1	0	0	155	1008.6	5	20	20.9	8.29	1630	38	1	0	1	0	0
281	2017	2017-05-29	19:40:00	22.6	65.8	1	0	0	277	1008.6	5	20	23.2	7.53	423	14	1	0	1	0	0
282	2017	2017-05-29	19:20:00	23.6	62.8	1	0	0	1468	1008.5	5	20	22.8	8.76	1430	36	1	0	1	0	1
284	2017	2017-06-01	20:00:00	20.7	55.3	2	0	0	72	997	5	50	21.1	8.41	1670	0	3	1	1	0	0
286	2017	2017-05-23	22:30:00	20.5	58.2	1	4	0	2	1004.9	2	7	20.1	7.96	464	6	3	1	1	0	0
287	2017	2017-05-23	22:00:00	20.9	54.1	2	4	1	2	1003.5	3	7	21.5	7.82	357	36	3	1	1	0	0
291	2017	2017-05-23	19:40:00	20.3	70.2	0	4	0	2	1003	2	7	20.9	7.57	681	3	3	1	1	0	0
292	2017	2017-05-23	21:20:00	21.4	41.2	0	4	0	2	1003.6	2	7	21.4	7.29	682	99	3	2	2	0	0
300	2017	2017-05-27	19:30:00	21.3	41.3	0	0	0	1558	999	5	5	20	8.15	538	0	0	0	0	0	0
307	2017	2017-05-27	18:50:00	24	38.2	1	0	0	8640	1000.2	5	5	23.8	8.32	945	2	0	0	0	0	0
308	2017	2017-05-27	19:10:00	24.3	37.6	1	0	0	3980	1000.3	5	5	22.9	8.77	757	4	1	0	0	0	0
309	2017	2017-05-27	18:30:00	23.2	39.3	2	0	0	10910	1000.2	5	5	24	7.93	1200	7	1	0	0	0	1
319	2017	2017-05-26	19:00:00	22.1	47.3	1	1	0	9465	1007.4	5	2	26.43	8.16	745	8	0	0	0	0	0
339	2017	2017-05-27	17:45:00	27.4	34.7	1	1	0	21460	998	5	5	28.7	7.84	543	5	0	0	0	0	0
0	2017	2017-05-27	17:15:00	25.4	37.7	0	1	0	35800	998	5	5	29.3	7.57	667	15	0	0	1	0	0
340	2017	2017-05-27	17:40:00	25.2	35.2	1	1	0	18510	998.3	5	5	27	9.15	304	13	0	0	0	0	0
0	2017	2017-05-27	18:10:00	28.6	31.4	1	1	0	18590	997.7	5	5	28.4	9.87	410	25	1	0	1	0	0
341	2017	2017-05-27	17:35:00	25.3	36.4	1	1	0	26890	998.2	5	5	28.5	8.41	543	0	0	0	0	0	0
386	2017	2017-05-27	16:50:00	24.7	38.9	1	1	0	216000	999.8	5	5	29.9	8.04	563	33	0	0	0	0	0
403	2017	2017-05-27	16:15:00	25.1	36.7	1	2	0	498000	1001	5	5	31.1	8.99	412	67	0	0	0	0	0
404	2017	2017-06-01	21:15:00	18.3	54.3	3	0	0	2	997.7	2	50	18.7	8.32	2670	2	3	2	2	0	0
405	2017	2017-06-01	21:30:00	18.5	52.6	3	0	0	2	997.8	2	50	18.4	7.41	1932	3	3	3	2	0	0
406	2017	2017-06-01	21:00:00	22.1	53.9	2	0	0	2	997.5	2	50	18.3	8.5	2660	13	3	1	1	0	0
407	2017	2017-06-01	20:45:00	22.1	52.8	2	0	0	2	997.5	2	50	22.1	7.83	993	22	3	2	3	0	0
408	2017	2017-06-01	20:30:00	20.1	49.7	2	0	0	4	997.2	4	50	20.2	8.67	1510	2	3	2	1	0	0
409	2017	2017-06-01	18:30:00	24.6	48.5	1	0	0	9170	995.6	5	50	22.3	8.54	632	2	0	0	0	0	0
410	2017	2017-06-01	18:10:00	24.9	49.3	2	0	0	13280	995.5	5	50	23.5	8.48	572	3	0	0	0	0	1
411	2017	2017-05-31	18:40:00	20	83.4	0	4	0	1065	997.6	5	41	19.4	7.89	109	53	1	0	1	0	0
412	2017	2017-05-31	20:50:00	19.5	88.5	0	4	0	2	998.2	2	41	21.3	8.43	243	20	3	1	1	0	0
413	2017	2017-05-31	21:20:00	20	88.6	0	4	0	2	998.3	2	41	22.2	8.41	744	2	3	1	1	0	0
414	2017	2017-05-31	21:50:00	20.4	79.6	0	4	0	2	998.6	2	41	22.1	8.4	781	1	3	1	2	0	0
415	2017	2017-05-31	22:35:00	22	80.2	0	4	0	2	998.6	2	41	21.7	8.33	431	2	3	3	2	1	0
416	2017	2017-05-31	23:05:00	20.7	84.7	0	4	0	2	998.6	2	41	22.1	8.51	413	68	3	3	3	1	0
417	2017	2017-05-31	22:10:00	20.4	88.3	0	4	0	2	998.6	2	41	21.3	8.91	632	8	1	1	1	0	0
418	2017	2017-05-31	20:30:00	20.9	82.3	0	4	0	2	998.3	2	41	22.3	8.03	601	52	3	0	0	0	0
419	2017	2017-05-31	20:15:00	20.6	86.4	0	4	0	2	998.1	2	41	20.7	8.35	880	101	3	3	2	0	0
420	2017	2017-05-31	19:50:00	21	82.1	0	4	0	2	998.1	5	41	21.6	9.03	313	83	3	1	1	0	0
421	2017	2017-05-31	19:30:00	21.6	80.5	0	4	0	2	998	5	41	22.4	9.16	463	21	3	0	0	0	0
422	2017	2017-05-31	19:00:00	20.8	82.9	0	4	0	78	997.7	5	41	21.4	8.31	661	43	1	0	1	0	0
423	2017	2017-05-31	18:45:00	21.2	80.3	0	4	0	74	997.7	5	41	22.2	8.42	585	39	1	0	0	0	0
424	2017	2017-05-31	18:30:00	20.4	79.9	0	4	0	1514	997.5	5	41	23.2	8.04	339	0	0	0	0	0	0
425	2017	2017-05-31	18:05:00	22.2	74.2	0	4	1	826	997.3	5	41	20.4	8.71	263	0	0	0	0	0	1
426	2017	2017-05-31	17:40:00	22.4	71.3	0	4	0	798	997.3	5	41	23.6	8.25	376	38	1	0	0	0	0
427	2017	2017-05-31	17:00:00	22.9	71.5	0	4	0	1035	997.5	5	41	22.7	8.73	182	4	1	0	1	0	0
428	2017	2017-05-31	16:35:00	22.9	72	0	4	1	3469	997.6	5	41	23.4	8.76	1030	0	0	0	0	0	1
429	2017	2017-05-31	16:25:00	24.2	68.4	0	4	0	6083	997.5	5	41	23.5	9.04	403	2	0	0	0	0	0
430	2017	2017-05-31	16:15:00	25.7	69.2	0	4	1	8578	997.3	5	41	25.6	8.79	336	2	0	0	0	0	1
